# Supplementary material for: MOF-derived two-dimensional N-doped carbon nanosheets coupled with Co–Fe–P–Se as efficient bifunctional OER/ORR catalysts
Source: Royal Society of Chemistry journal article supplement (doi:10.1039/c9nr05744g), 2019-01-01
Supplement: c9nr05744g1.pdf [file c9nr05744g1.pdf]

***Supporting Information***

**MOF Derived Two-dimensional N-doped Carbon Nanosheets Coupled  
with Co-Fe-P-Se as Efficient Bifunctional OER/ORR Catalysts**

Hengbo Wu<sup>a</sup>, Jie Wang<sup>c</sup>, Ji Yan<sup>d</sup>, Zexing Wu<sup>b</sup>, \*, Wei Jin<sup>a, \*</sup>

- a) School of Chemical and Material Engineering, Jiangnan University, Wuxi 214122,  
China
- b) College of Chemistry and Molecular Engineering, Qingdao University of Science &  
Technology, Qingdao 266042, PR China
- c) College of Chemistry and Pharmaceutical Sciences, Qingdao Agricultural University,  
Qingdao, 266109, China.
- d) School of Materials and Chemical Engineering, Zhengzhou University of Light  
Industry, Zhengzhou 450001, Henan, PR China

## Experimental section

### Samples synthesis

Typically,  $\text{Co}(\text{NO}_3)_2 \cdot 6\text{H}_2\text{O}$  and  $\text{FeCl}_3 \cdot 6\text{H}_2\text{O}$  with different molar ratios (Co:Fe, 1:1, 1:3, 1:5) were dissolved in 10 mL ethanol solution (solution A). 1.4 g (10 mmol) of HMT was added into 10 mL ethanol and stirred to form clear solution (solution B). Then, solution A was mixed with solution B to form yellow-green precipitates immediately. The mixture solution was continually stirred for 10 h and the product was collected by vacuum filtration and dried at 60 °C (Co-Fe-HMT). Subsequently, the obtained Co-Fe-HMT frameworks (0.1g) were pyrolyzed in the presence of  $\text{NaH}_2\text{PO}_2 \cdot \text{H}_2\text{O}$  and selenium powder at 600 °C for 2 h in nitrogen atmosphere, denoted as Co-Fe-P-Se/NC (Scheme 1). For comparison, other samples were synthesized using the identical strategy. Co/NC and Fe/NC were prepared in the absence of  $\text{FeCl}_3 \cdot 6\text{H}_2\text{O}$ ,  $\text{NaH}_2\text{PO}_2 \cdot \text{H}_2\text{O}$ , selenium powder and  $\text{Co}(\text{NO}_3)_2 \cdot 6\text{H}_2\text{O}$ ,  $\text{NaH}_2\text{PO}_2 \cdot \text{H}_2\text{O}$ , selenium powder, respectively. Co-Fe-Se/NC was synthesized without the addition of  $\text{NaH}_2\text{PO}_2 \cdot \text{H}_2\text{O}$ . Co-Fe-P/NC was synthesized without the addition of selenium powder. Co-P-Se/NC and Fe-P-Se/NC were prepared in the absence of  $\text{FeCl}_3 \cdot 6\text{H}_2\text{O}$  and  $\text{Co}(\text{NO}_3)_2 \cdot 6\text{H}_2\text{O}$ , respectively

### Physical Characterization

The surface morphology of the prepared samples were measured by field emission scanning electron microscopy (FE-SEM, Hitachi S4800) and transmission electron microscope (Tecnai G2 20) with an acceleration voltage of 200 kV. X-ray diffractometer (XRD, BUKER AXS D8) was performed to collect the structural information of the obtained samples. Elemental content and chemical valence state were collected by X-ray photoelectron spectroscopy (XPS, Thermo ESCALAB 250XI). Fourier transform infrared spectroscopy (FT-IR, WQF-600N) was used to study the chemical structures of the prepared nanomaterials.

### Electrochemical Characterization

All the electrochemical measurements were carried out in a typical three-electrode system on a CHI760e electrochemical workstation by using glassy carbon electrode (5mm in diameter), graphite rod and Ag/AgCl as working electrode, counter electrode and reference electrode, respectively. 2 mg catalyst powder with 0.4 mg Vulcan XC-72 was dispersed in a mixture of 392  $\mu\text{L}$  ethanol and 8  $\mu\text{L}$  5% Nafion by sonication for 1 h to form homogenous ink. Then 11.5  $\mu\text{L}$  of the obtained ink was dropped onto polished glassy carbon electrode with loading amount of 0.35  $\text{mg cm}^{-2}$  and dried at room temperature.

Electrochemical studies were performed by using cyclic voltammetry (CV) and linear sweep voltammetry (LSV) techniques at room temperature. All the LSVs for OER and ORR were collected with a scanning rate of 5  $\text{mV s}^{-1}$ . Using the slopes of Koutecky-Levich (K-L) plots to calculate the electron transfer number ( $n$ ) in an ORR process:

$$\frac{1}{j} = \frac{1}{jk} + \frac{1}{Bw^{1/2}} \quad (1)$$

$$B = 0.2FC_0D_0^{(2/3)} \nu^{(-1/6)} \quad (2)$$

where  $jk$ ,  $j$ ,  $w$  represent the kinetic current density at a constant potential, the measured current density, and the electrode rotating speed of the disk, respectively.

is Faraday constant (96485 C/mol),  $C_0$  is the bulk concentration of  $O_2$  ( $1.2 \times 10^{-6}$  mol/cm<sup>3</sup>),  $D_0$  is the diffusion coefficient of  $O_2$  in 0.1 M KOH ( $1.9 \times 10^{-5}$  cm<sup>2</sup>/s) and  $V$  is the kinematic viscosity of the electrolyte (0.01 cm<sup>2</sup>/s).

#### **Zinc-air battery test**

0.2 g of Co-Fe-P-Se/NC was dispersed in a mixture of 1.96 mL ethanol and 40  $\mu$ L Nafion (5%) and ultra-sonicated to form homogenous ink. For Zn-air battery, a carbon paper electrode (1 cm<sup>2</sup>) equipped with Co-Fe-P-Se/NC (10 mg) was used as cathode and a polished Zn foil as anode. The electrolyte was 6 M KOH with 0.2 M Zn (CH<sub>3</sub>COO)<sub>2</sub>. All Zn-air batteries were evaluated under ambient conditions. Constant current discharge-charge cycle is performed at room temperature in a LAND CT2001A battery system.

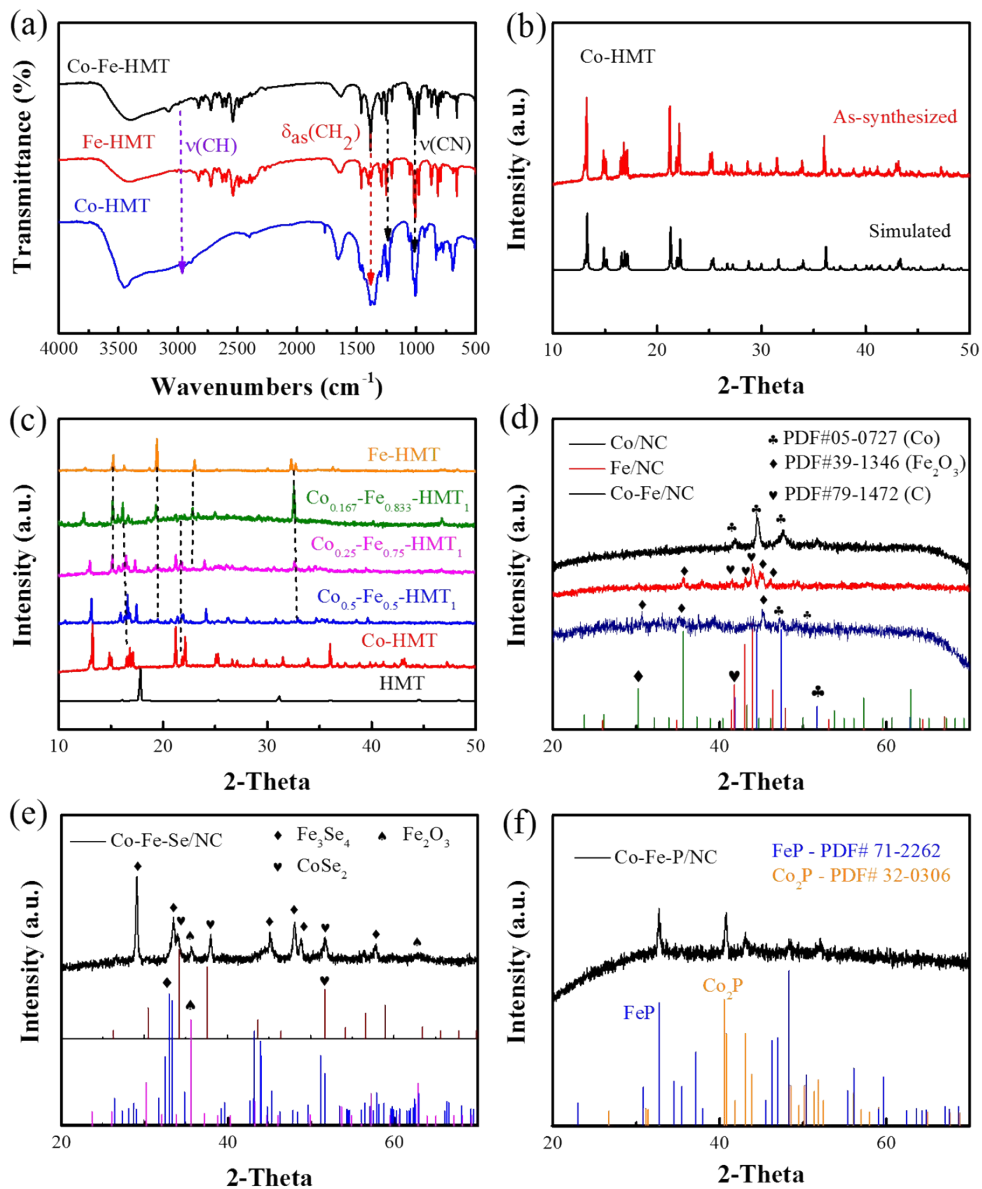

**Fig. S1** (a) FT-IR spectrum of Co-HMT, Fe-HMT and Co-Fe-HMT. (b) Experimental and simulated powder XRD pattern of Co-HMT. (c) XRD patterns of HMT and Co-Fe-HMT nanorods with different molar ratios. (d) XRD pattern of Co/NC, Fe/NC and Co-Fe/NC. (e) XRD pattern of Co-Fe-Se/NC. (f) XRD pattern of Co-Fe-P/NC.

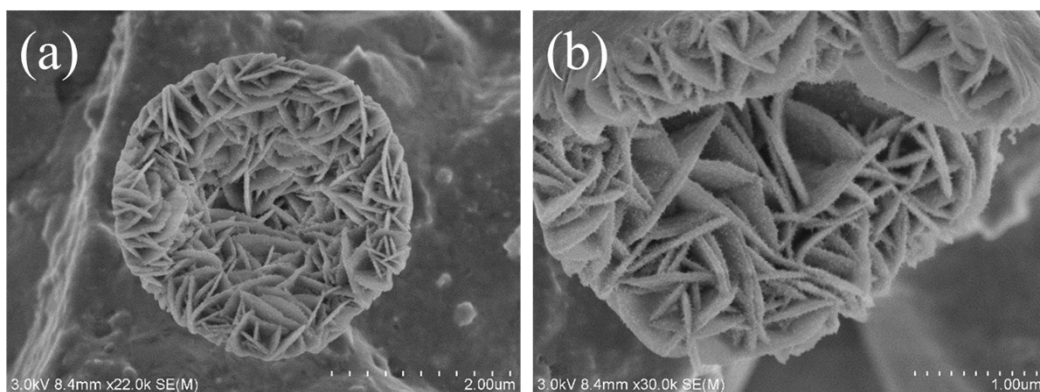

**Fig. S2** FE-SEM image of the obtained Co-Fe/NC.

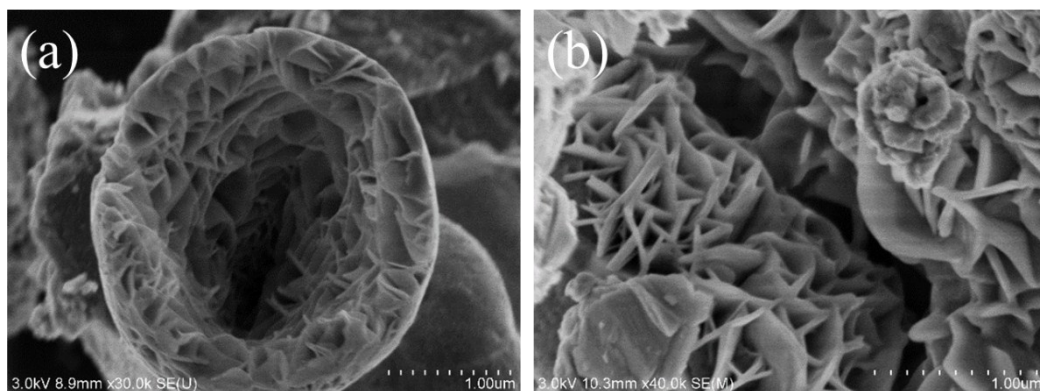

**Fig. S3** FE-SEM image of the obtained Co-Fe-Se/NC.

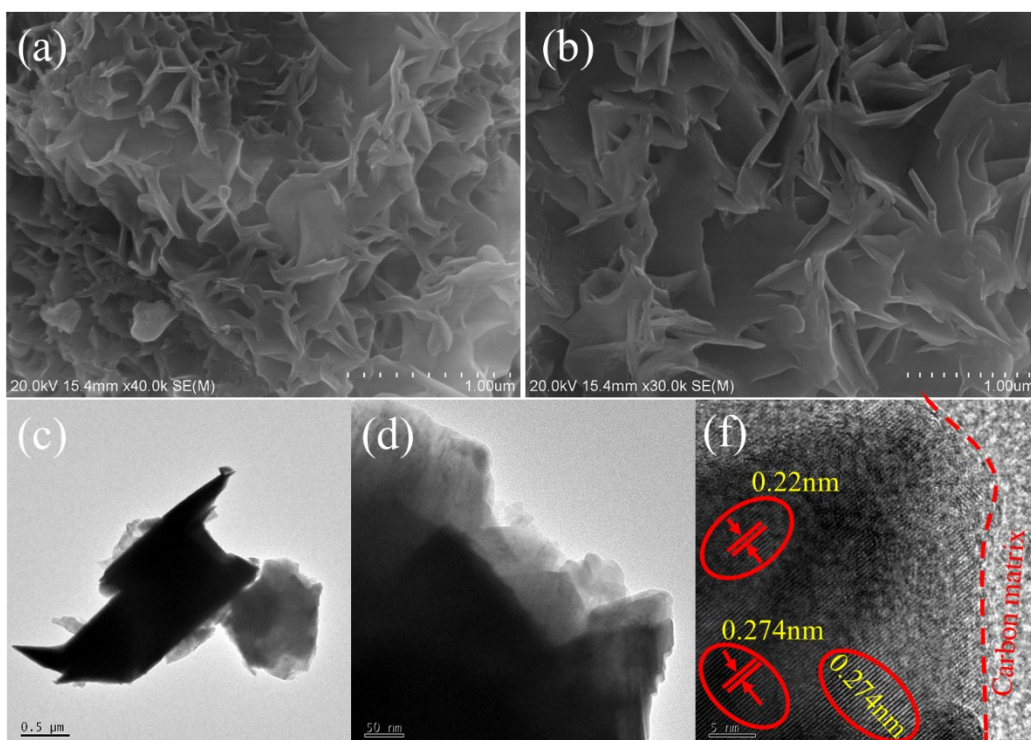

**Fig. S4** FE-SEM (a -b). Low (c-d) and high resolution (f) TEM images of the obtained Co-Fe-P/NC.

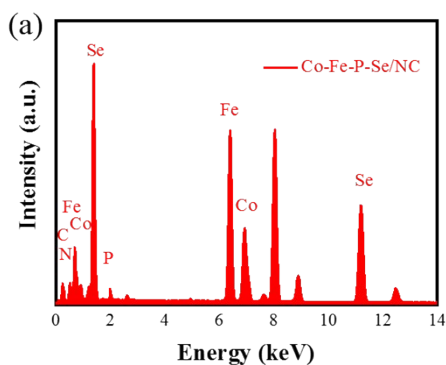

**Fig. S5** (a) EDX spectra of Co-Fe-P-Se/NC.

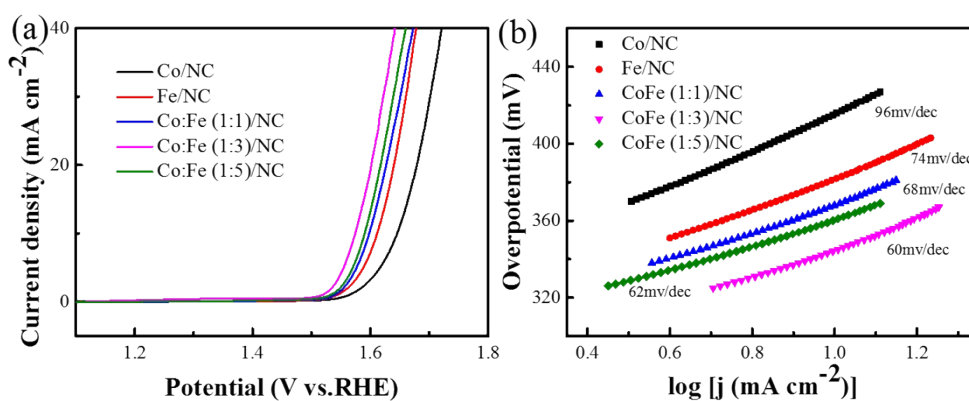

**Fig. S6** (a) LSV polarization curves (b) The corresponding Tafel plots of Co/NC, Fe/NC, Co-Fe/NC with different ratios in OER process respectively.

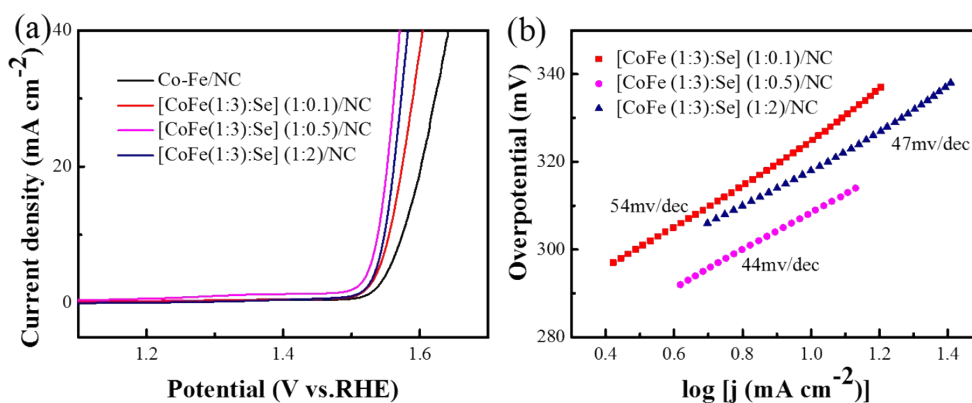

**Fig. S7** (a) LSV polarization curves (b) The corresponding Tafel plots of Co-Fe/NC and Co-Fe-Se/NC with different ratios of Se in OER process respectively.

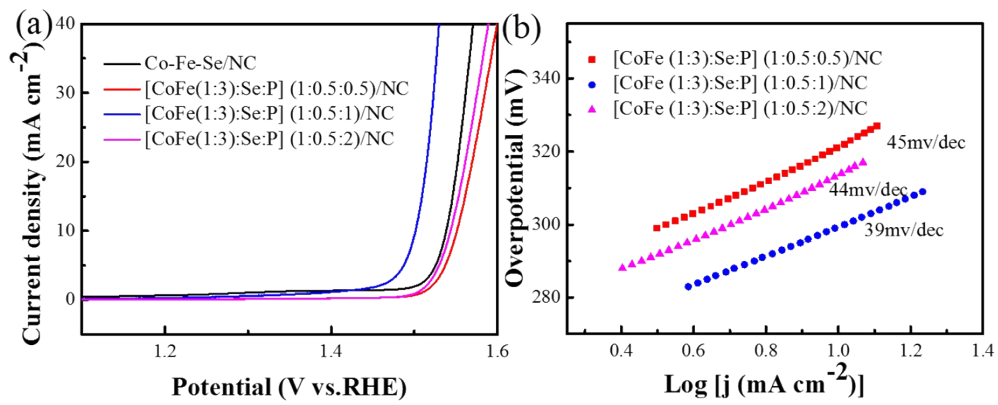

**Fig. S8** (a) LSV polarization curves (b) The corresponding Tafel plots of Co-Fe-Se/NC and Co-Fe-P-Se/NC with different ratios of  $\text{NaH}_2\text{PO}_2$  in OER process respectively.

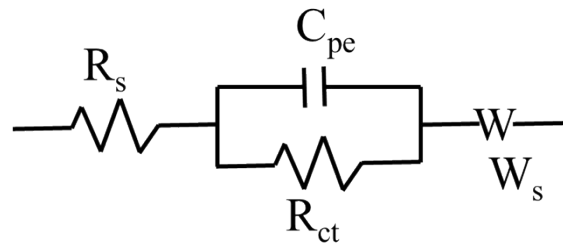

**Fig. S9** equivalent circuit for the electrodes.

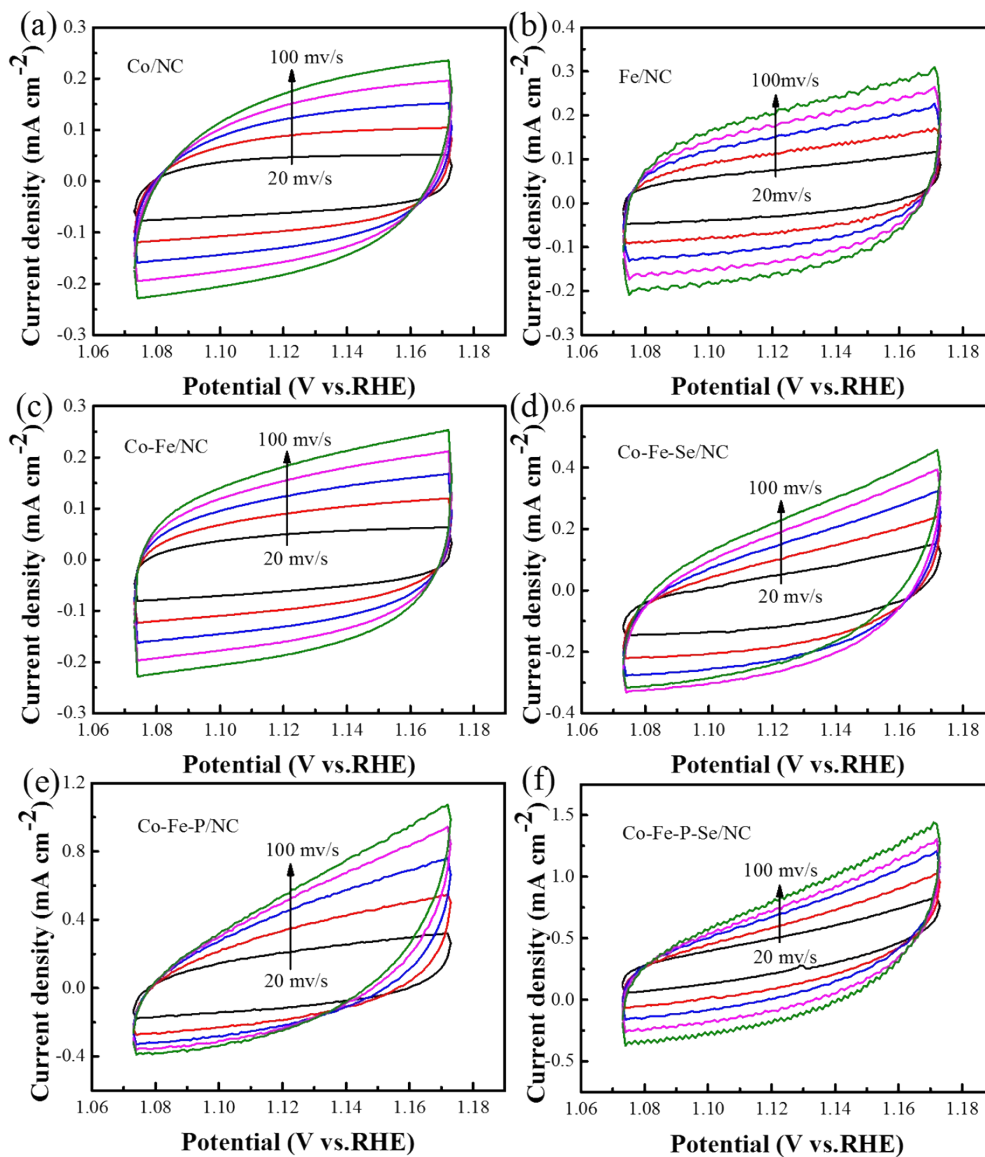

**Fig. S10** CVs of Co/NC(a), Fe/NC(b), Co-Fe/NC(c), Co-Fe-Se/NC(d), Co-Fe-P/NC(e), Co-Fe-P-Se/NC(f)

at different sweeping rates from 20 mV s<sup>-1</sup> to 100 mV s<sup>-1</sup> in 1 M KOH.



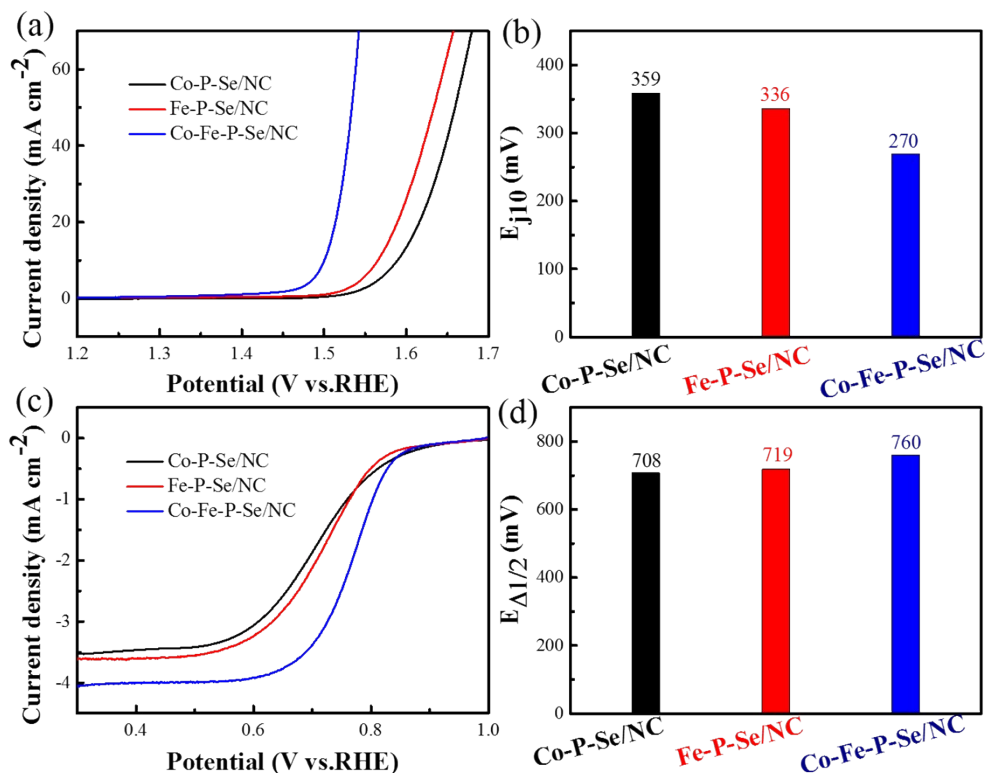

**Fig. S11** LSVs of Co-P-Se/NC, Fe-P-Se/NC and Co-Fe-P-Se/NC for OER (a) and ORR (c).

Overpotentials between the E<sub>j10</sub> for OER (b) and E<sub>1/2</sub> for ORR (d) of the prepared samples.

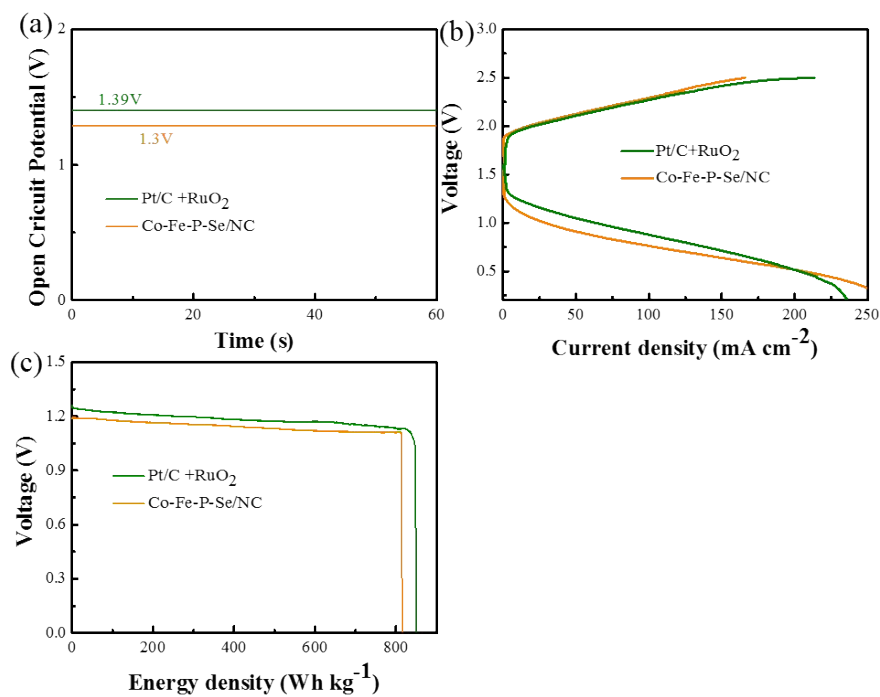

**Fig. S12** Zn-air battery performance: (a) Open circuit plots (b) Charge and discharge polarization

curves (c) the corresponding energy density plots at 10 mA cm<sup>-2</sup>

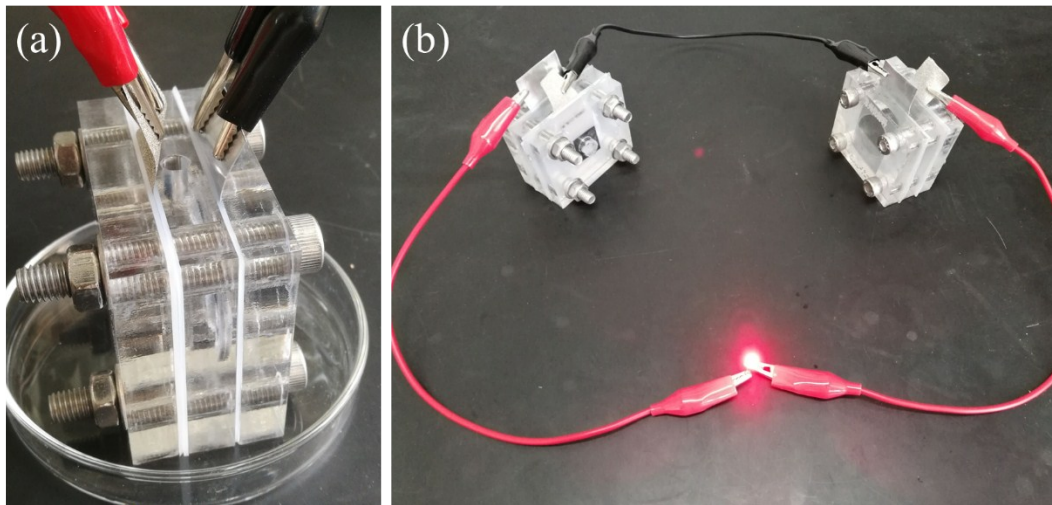

**Fig. S13** (a) Schematic illustration of the Zinc-air batteries (b) photograph of a red LED (2.0 V) powered by two tandem Zinc-air batteries equipped with Co-Fe-P-Se/NC

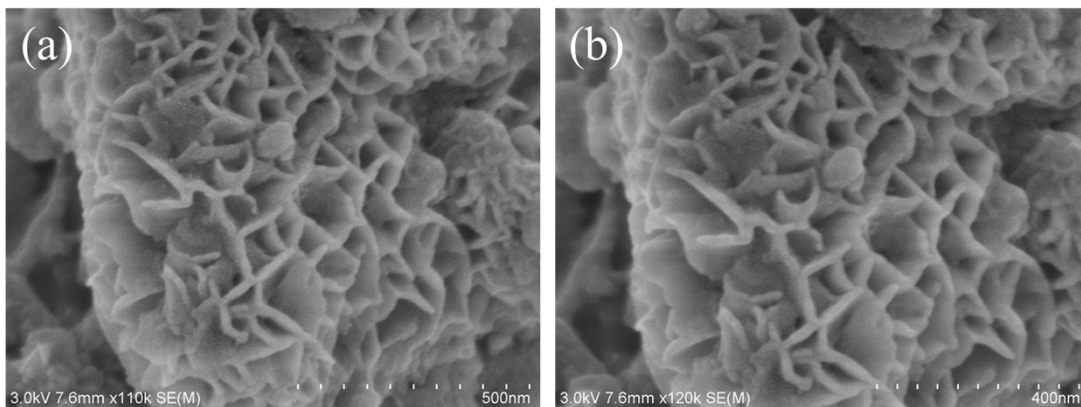

**Fig. S14** (a, b) FE-SEM images of the obtained Co-Fe-P-Se/NC after zinc-air batteries test.

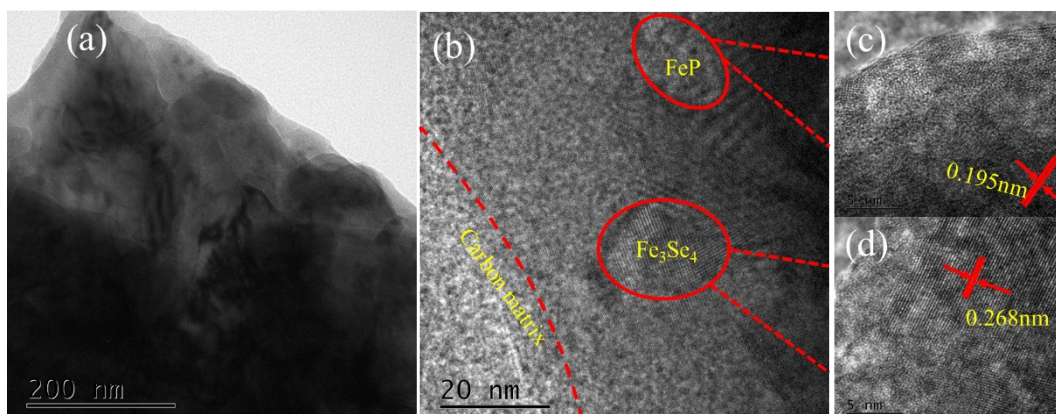

**Fig. S15** HR-TEM image of the obtained Co-Fe-P-Se/NC after Zinc-air batteries test

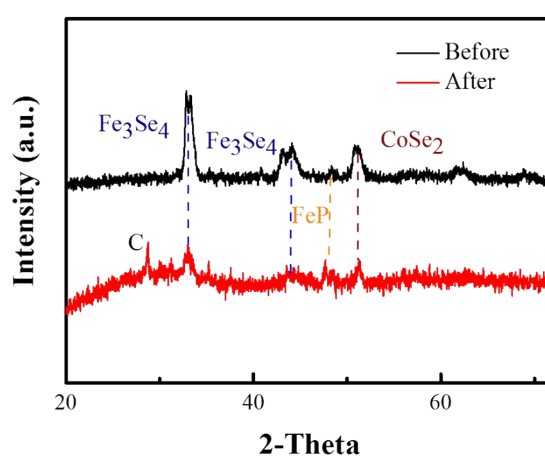

**Fig. S16** XRD pattern of Co-Fe-P-Se/NC after stability test for Zinc-air batteries

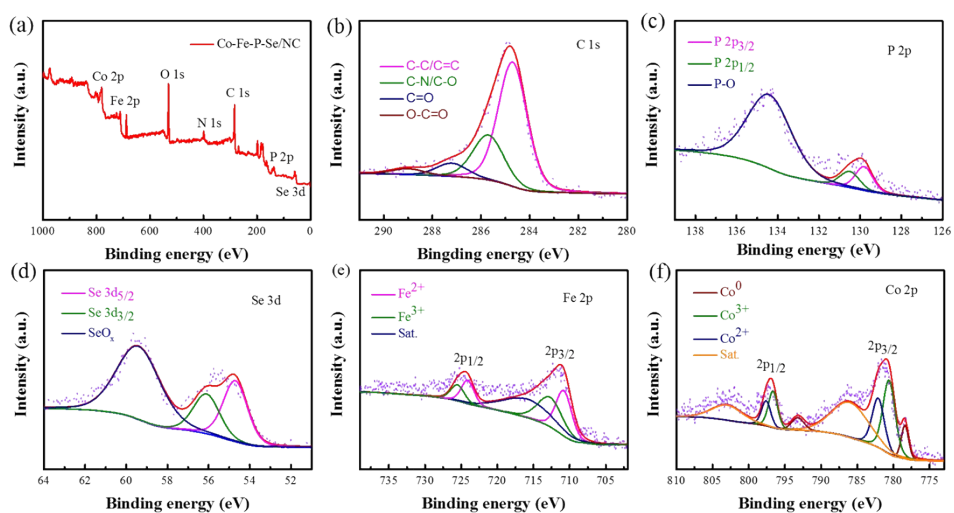

**Fig. S17** (a) XPS spectra of Co-Fe-P-Se/NC after stability test for zinc-air batteries and corresponding C 1s(b), P 2p(c), Se 3d(d), Fe 2p(e) and Co 2p(f).

**Table S1** Comparison of the  $R_s$  ( $\Omega$ ),  $R_{ct}$  ( $\Omega$ ) values of Co/NC, Fe/NC, Co-Fe/NC, Co-Fe-Se/NC, Co-Fe-P/NC, Co-Fe-P-Se/NC in alkaline media.

| Catalyst      | $R_s$ ( $\Omega$ ) | $R_{ct}$ ( $\Omega$ ) |
|---------------|--------------------|-----------------------|
| Co/NC         | 3.669              | 12.1                  |
| Fe/NC         | 2.814              | 8.545                 |
| Co-Fe/NC      | 3.322              | 7.337                 |
| Co-Fe-Se/NC   | 3.153              | 5.66                  |
| Co-Fe-P/NC    | 4.549              | 5.162                 |
| Co-Fe-P-Se/NC | 3.93               | 3.235                 |

**Table S2** Comparison of the performances of ZABs of our work and other reported catalysts.

| Catalysts                                     | Electrolyte                           | Power density (mW/cm <sup>2</sup> ) | Open-circuit voltage (V) | Long-term Stability (h) | Energy density (Wh Kg <sup>-1</sup> ) | Ref.      |
|-----------------------------------------------|---------------------------------------|-------------------------------------|--------------------------|-------------------------|---------------------------------------|-----------|
| Co-Fe-P-Se/NC                                 | 6.0 M KOH + 0.2 M Zn(Ac) <sub>2</sub> | 104                                 | 1.3                      | 40                      | 805                                   | This work |
| Pt/C+RuO <sub>2</sub>                         | 6.0 M KOH + 0.2 M Zn(Ac) <sub>2</sub> | 108.5                               | 1.39                     | 17                      | 848                                   | This work |
| FeCo-NC ps                                    | 6.0 M KOH + 0.2 M Zn(Ac) <sub>2</sub> | 242                                 | 1.43                     | 155                     | 922                                   | 1         |
| CoIn <sub>2</sub> S <sub>4</sub> /S-rGO       | 6.0 M KOH + 0.2 M ZnCl <sub>2</sub>   | 133                                 | 1.42                     | 50                      | 951                                   | 2         |
| Fe/Fe <sub>3</sub> C@C                        | 6.0 M KOH                             | 101.3                               | 1.37                     | 99                      | 764.5                                 | 3         |
| Co-N-CNTs                                     | 6.0 M KOH + 0.2 M Zn(Ac) <sub>2</sub> | 101                                 | 1.365                    | 15                      | -                                     | 4         |
| Co <sub>3</sub> O <sub>4</sub> -doped Co/CoFe | 6 M KOH                               | 97                                  | 1.43                     | 65                      | 819                                   | 5         |
| N-GCNT/FeCo                                   | 6.0 M KOH + 0.2 M Zn(Ac) <sub>2</sub> | 89.3                                | 1.48                     | 40                      | 653.2                                 | 6         |
| Mn <sub>3</sub> O <sub>4</sub> /O-CNT         | 6.0 M KOH + 0.2 M ZnCl <sub>2</sub>   | 86.6                                | 1.45                     | 150                     | -                                     | 7         |
| NiFe@NCX                                      | 6 M KOH                               | 80                                  | -                        | 34                      | 732.3                                 | 8         |
| CoO NRs                                       | 6 M KOH                               | 60.2                                | 1.43                     | 20                      | 583.3                                 | 9         |

|                               |                                       |       |       |     |     |    |
|-------------------------------|---------------------------------------|-------|-------|-----|-----|----|
| CoZn-NC-700                   | 6.0 M KOH + 0.2 M ZnCl <sub>2</sub>   | 152   | 1.36  | 64  | 694 | 10 |
| NPMC-1000                     | 6.0 M KOH                             | 55    | 1.48  | 240 | 835 | 11 |
| NCN-1000-5                    | 6.0 M KOH + 0.2 M Zn(Ac) <sub>2</sub> | 207   | 1.44  | 330 | 806 | 12 |
| P,S-CNS                       | 6.0 M KOH + 0.2 M Zn(Ac) <sub>2</sub> | 198   | 1.51  | 100 | 845 | 13 |
| BHPC-950                      | 6.0 M KOH                             | 197   | 1.44  | 180 | 963 | 14 |
| NGM-Co                        | 6.0 M KOH + 0.2 M ZnCl <sub>2</sub>   | 152   | 1.439 | 60  | 840 | 15 |
| NCNF                          | 6.0 M KOH + 0.2 M Zn(Ac) <sub>2</sub> | 185   | 1.48  | 83  | 838 | 16 |
| CoNi@NCNT/NF                  | 6.0 M KOH + 0.2 M Zn(Ac) <sub>2</sub> | 127   | 1.4   | 90  | 845 | 17 |
| Ag-Cu on Ni foam              | 6.0 M KOH + 0.2 M Zn(Ac) <sub>2</sub> | 85.8  | 1.48  | 33  | 641 | 18 |
| Cu-Co <sub>2</sub> P @ 2D-NPC | 6.0 M KOH + 0.2 M ZnCl <sub>2</sub>   | 236.1 | 1.4   | 160 | 950 | 19 |
| CoN <sub>4</sub> /NG          | 6M KOH + 0.2M ZnO                     | 115   | 1.51  | 100 | 671 | 20 |

## References

1. J. Liu, T. He, Q. Wang, Z. Zhou, Y. Zhang, H. Wu, Q. Li, J. Zheng, Z. Sun, Y. Lei, J. Ma and Y. Zhang, *J. Mater. Chem. A*, 2019, **7**, 12451-12456.
2. G. Fu, J. Wang, Y. Chen, Y. Liu, Y. Tang, J. B. Goodenough and J.-M. Lee, *Adv. Energy Mater.*, 2018, **8**, 1802263.
3. Q. Wang, Y. Lei, Z. Chen, N. Wu, Y. Wang, B. Wang and Y. Wang, *J. Mater. Chem. A*, 2018, **6**, 516-526.
4. T. Wang, Z. Kou, S. Mu, J. Liu, D. He, I. S. Amiinu, W. Meng, K. Zhou, Z. Luo, S. Chaemchuen and F. Verpoort, *Adv. Funct. Mater.*, 2018, **28**, 1705048.
5. T. Li, Y. Lu, S. Zhao, Z. D. Gao and Y. Y. Song, *J. Mater. Chem. A*, 2018, **6**, 3730-3737.
6. C. Y. Su, H. Cheng, W. Li, Z. Q. Liu, N. Li, Z. Hou, F. Q. Bai, H. X. Zhang and T. Y. Ma, *Adv. Energy Mater.*, 2017, **7**, 1602420.
7. L. Li, J. Yang, H. Yang, L. Zhang, J. Shao, W. Huang, B. Liu and X. Dong, *ACS Appl. Energy Mater.*, 2018, **1**, 963-969.
8. J. Zhu, M. Xiao, Y. Zhang, Z. Jin, Z. Peng, C. Liu, S. Chen, J. Ge and W. Xing, *ACS Catal.*, 2016, **6**, 6335-6342.
9. P. Da, M. Wu, K. Qiu, D. Yan, Y. Li, J. Mao, C. Dong, T. Ling and S. Qiao, *Chem. Eng. Sci.*, 2019, **194**, 127-133.
10. X. Wu, X. Han, X. Ma, W. Zhang, Y. Deng, C. Zhong and W. Hu, *ACS Appl. Mater. Interfaces*, 2017, **9**, 12574-12583.
11. J. Zhang, Z. Zhao, Z. Xia and L. Dai, *Nat. Nanotechnol.*, 2015, **10**, 444-452.
12. H. Jiang, J. Gu, X. Zheng, M. Liu, X. Qiu, L. Wang, W. Li, Z. Chen, X. Ji and J. Li, *Energy Environ. Sci.*, 2019, **12**, 322-333.
13. S. S. Shinde, C. H. Lee, A. Sami, D. H. Kim, S. U. Lee and J. H. Lee, *ACS nano*, 2017, **11**, 347-357.
14. M. Yang, X. Hu, Z. Fang, L. Sun, Z. Yuan, S. Wang, W. Hong, X. Chen and D. Yu, *Adv. Funct. Mater.*, 2017, **27**, 1701971.
15. C. Tang, B. Wang, H. F. Wang and Q. Zhang, *Adv. Mater.*, 2017, **29**, 1703185.
16. Q. Liu, Y. Wang, L. Dai and J. Yao, *Adv. Mater.*, 2016, **28**, 3000-3006.
17. W. Niu, S. Pakhira, K. Marcus, Z. Li, J. L. Mendoza-Cortes and Y. Yang, *Adv. Energy Mater.*, 2018, **8**, 1800480.
18. Y. Jin and F. Chen, *Electrochim. Acta*, 2015, **158**, 437-445.

19. L. Diao, T. Yang, B. Chen, B. Zhang, N. Zhao, C. Shi, E. Liu, L. Ma and C. He, *J. Mater. Chem. A*, 2019, **7**, 21232-21243.
20. L. Yang, L. Shi, D. Wang, Y. Lv and D. Cao, *Nano Energy*, 2018, **50**, 691-698.
